# Supplementary material for: Comment on “Zemplén transesterification: a name reaction that has misled us for 90 years” by B. Ren, M. Wang, J. Liu, J. Ge, X. Zhang and H. Dong, Green Chemistry, 2015, 17, 1390–1394
Source: Royal Society of Chemistry journal article supplement (doi:10.1039/c7gc03795c), 2018-01-01
Supplement: c7gc03795c1.pdf [file c7gc03795c1.pdf]

## Supporting Information

### Comment on “Zemplén transesterification: a name reaction that has misled us for 90 years” *Green Chem.* 2015, 17, 1390-1394

Cristofer Pezzetta,<sup>a,b</sup> Sofja Tshepelevitsh,<sup>c</sup> Ivo Leito,<sup>c</sup> and Giovanni Poli<sup>d\*</sup>

a) *Dr. Reddy's Laboratories (EU), 410 Science Park, Milton Road, Cambridge CB4 0PE, UK*

b) *School of Chemistry, Cardiff University, Park Place Main Building, Cardiff CF10 3AT, UK*

c) *University of Tartu, Institute of Chemistry, Ravila 14a, Tartu 50411, Estonia*

d) *Sorbonne Université, Institut Parisien de Chimie Moléculaire, UMR CNRS 8232, Case 229, 4 Place Jussieu 75252 Paris Cedex 05, France*

#### Content

#### 1. Estimation of the relative rates of mechanisms a-d in Figure S7 of the original paper

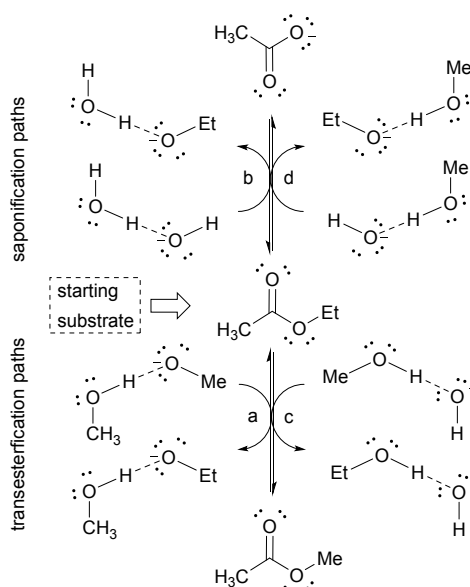

**Scheme 1.** The four mechanisms, a-d, computed in the title manuscript. a) Transesterification via methanol-assisted methoxy anion  $[\text{Me-O-H}\cdots\text{O-Me}]^-$  addition. b) Saponification via water-assisted hydroxyl anion addition  $[\text{H-O-H}\cdots\text{OH}]^-$ . c) Transesterification via hydroxyl-anion-assisted methanol addition  $[\text{Me-O-H}\cdots\text{OH}]^-$ . d) Saponification via methanol-assisted hydroxyl anion addition  $[\text{HO}\cdots\text{H-O-Me}]^-$ .

The ratio between the Arrhenius equations relative to the two competing global activation energies ( $E_a$ ), as from the DFT computational study by H. Dong *et al.*,<sup>1</sup> (see **Figure S7** of their article), gives

the ratio between the rate constants concerned in the competing mechanisms. Accordingly, the ratio between rate constants between the transesterification mechanisms a) and c) can be obtained as follows<sup>2</sup>:

$$k = A e^{\frac{-E_a}{RT}}$$

$$\frac{k_a}{k_c} = \frac{A_a}{A_c} e^{\frac{-(E_a^a - E_a^c)}{RT}} \cong e^{\frac{(-19.9 + 18.4) \text{ kcal/mol}}{0.593 \text{ kcal/mol}}} = e^{-2.53} = 0.08$$

Thus, the rate constant of the hydroxyl-anion-assisted transesterification path c) is 12.5 times as fast as that of the methanol-assisted path a).

Let us now take, for example, the reaction conditions for the large scale transesterification experiment: penta-acetyl-glucose (10 g), NaOH (105 mg), methanol (100 mL). Converting the amounts of the reagents in moles:

$$MeOH: 100 \text{ mL} \Rightarrow 79.2 \text{ g} \Rightarrow 2.472 \text{ mol}$$

$$NaOH: 105 \text{ mg} \Rightarrow 2.625 \cdot 10^{-3} \text{ mol}$$

$$\frac{n_{MeOH}}{n_{NaOH}} = 941.609$$

The first row of table 1 shows the initial amounts of the components, while the second one discloses the new amounts of the components as a function of the equilibrium constant  $K_{eq}$ ,  $x$  representing the equal amounts of MeONa and H<sub>2</sub>O present at equilibrium.

**Table 1.** Amounts of the components of the transesterification reaction.

$$MeOH + NaOH \xrightleftharpoons{K_{eq}} MeONa + H_2O$$

|             | MeOH          | HONa        | MeONa | H <sub>2</sub> O |
|-------------|---------------|-------------|-------|------------------|
| $t_0$       | 941.609       | 1.000       | 0     | 0                |
| $t_{equil}$ | 941.609 - $x$ | 1.000 - $x$ | $x$   | $x$              |

The equilibrium constant  $pK_{eq}$  can be found by subtracting the dissociation constant of methanol ( $18.2 \pm 0.5$ ) from the dissociation constant of water in methanol as a solvent. The latter was estimated by extrapolation as  $18.7 \pm 1.2$  (see the Excel spreadsheet for the details of calculation).

Considering a  $pK_{eq} \cong -0.5$  for such equilibrium, the value for  $x$  is found:

$$K_{eq} = \frac{[MeONa] \cdot [H_2O]}{[MeOH] \cdot [NaOH]} \Rightarrow 10^{0.5} = \frac{x^2}{(941.609 - x)(1.000 - x)} \Rightarrow x = 0.9997$$

This allows us to update our values as described in Table 2.

<sup>1</sup> B. Ren, M. Wang, J. Liu, J. Ge, X. Zhang, H. Dong, *Green Chem.*, **2015**, *17*, 1390.

<sup>2</sup> The values of the pre-exponential factors A for the two mechanisms are assumed to be identical.

**Table 2.** Amounts of the components of the transesterification reaction, considering  $pK_{eq} = -0.5$

|             | MeOH    | HONa   | MeONa  | H <sub>2</sub> O |
|-------------|---------|--------|--------|------------------|
| $t_0$       | 941.609 | 1.000  | 0      | 0                |
| $t_{equil}$ | 940.611 | 0.0003 | 0.9997 | 0.9997           |

The thus obtained equilibrium values allow determining the effective molar ratio  $\alpha$  between MeONa and HONa, which are the catalysts of the two competing mechanisms:

$$\alpha = \frac{n_{MeONa}}{n_{NaOH}} = 2962$$

Taking into account the relative amounts of the species in solution, allows us to obtain the ratio between the reaction rates:

$$\frac{r_a}{r_c} = \alpha \frac{k_a}{k_c} = 2962 \cdot 0.08 = 237$$

Thus, in the transesterification reaction according to the protocol proposed by Dong and co-workers (large scale experiment), the classical Zemplén mechanism a) turns out to run over 200 times faster than the proposed hydroxyl-anion assisted mechanism c).

Taking into account the uncertainties of the used  $pK_a$  values, the borderline  $pK_{eq}$  values were estimated as 0.8 and -1.8. The corresponding ratios  $r_a/r_c$  are 12 and 4726, respectively.

Repeating the calculation for the other mechanisms, using mechanism c) as a common reference, yields:

$$\frac{r_b}{r_c} = \alpha^{-1} \frac{k_b}{k_c} = \alpha^{-1} e^{\frac{(-20.8 + 18.4) \text{ kcal/mol}}{0.593 \text{ kcal/mol}}} = \alpha^{-1} e^{-4.05} = \frac{0.017}{2962} = 6 \cdot 10^{-6}$$

$$\frac{r_d}{r_c} = \frac{k_d}{k_c} = e^{\frac{(-21.1 + 18.4) \text{ kcal/mol}}{0.593 \text{ kcal/mol}}} = e^{-4.55} = 0.010$$

From these results, it follows that both the proposed mechanisms for saponification [b) and d)] are much slower than those proposed for transesterification [a) and c)]. Comparing now the fastest transesterification mechanism with the fastest saponification mechanism, respectively a) and d), we obtain:

$$\frac{r_a}{r_d} = \frac{237}{0.01} = 23700$$

This indicates that transesterification is about  $24 \cdot 10^3$  times as fast as saponification.

## 2. Role of water in the transesterification reaction

Chosen conditions: experiment with 10% (v/v) of water in methanol, employing 1 mL of solution and 0.1 equiv. of base (we choose NaOH) related to the 100 mg of penta-acetyl glucoside.

Performing the same calculations as before, we find:

$$\text{MeOH}: 0.9 \text{ mL} \Rightarrow 22.25 \text{ mmol}$$

$$\text{H}_2\text{O}: 0.1 \text{ mL} \Rightarrow 5.56 \text{ mmol}$$

$$\text{NaOH}: 0.1 \text{ equiv. of } 100 \text{ mg (0.256 mmol) of substrate} \Rightarrow 2.625 \cdot 10^{-2} \text{ mmol}$$

$$\frac{n_{\text{MeOH}}}{n_{\text{NaOH}}} = 847.555 \quad \frac{n_{\text{H}_2\text{O}}}{n_{\text{NaOH}}} = 211.448$$

|                    | MeOH      | NaOH | MeONa | H <sub>2</sub> O |
|--------------------|-----------|------|-------|------------------|
| t <sub>0</sub>     | 847.555   | 1    | 0     | 211.448          |
| t <sub>equil</sub> | 847.555-x | 1-x  | x     | 211.448+x        |

The pK<sub>eq</sub> value in methanol-water solution (volume fraction of methanol 0.9, molar fraction 0.8) was estimated as -0.3 ± 0.7. Therefore:

$$10^{0.3} = \frac{x(211.448 + x)}{(847.555 - x)(1 - x)}$$

$$x = 0.897$$

|                 | MeOH    | NaOH  | MeONa | H <sub>2</sub> O |
|-----------------|---------|-------|-------|------------------|
| t <sub>0</sub>  | 847.555 | 1     | 0     | 211.448          |
| t <sub>eq</sub> | 846.658 | 0.103 | 0.897 | 212.345          |

$$\alpha = \frac{n_{\text{MeONa}}}{n_{\text{NaOH}}} = 9$$

$$\frac{r_a}{r_c} = \alpha \frac{k_a}{k_c} = 9 \cdot 0.08 = 0.7$$

$$\frac{r_b}{r_c} = \alpha^{-1} \frac{k_b}{k_c} = \frac{0.017}{9} = 0.002$$

$$\frac{r_d}{r_c} = \frac{k_d}{k_c} = 0.010$$

Considering the uncertainty of the pK<sub>eq</sub>, the borderline values of r<sub>a</sub>/r<sub>c</sub> are 0.1 and 3.5.

Thus, mechanism a) is very likely slower than mechanism c), making in this case the new proposed mechanism actually competitive with the classical one. On the other hand, saponification remains always slower than transesterification, although the difference between the two pathways becomes less important.
