# Supplementary material for: Comment on “Zemplén transesterification: a name reaction that has misled us for 90 years” by B. Ren, M. Wang, J. Liu, J. Ge, X. Zhang and H. Dong, Green Chemistry, 2015, 17, 1390–1394
Source: Royal Society of Chemistry journal article supplement (doi:10.1039/c7gc03795c), 2018-01-01
Supplement: c7gc03795c2.xlsx [file c7gc03795c2.xlsx]

## Sheet: Title_page
	Supporting Information
	Comment on “Zemplén transesterification: a name reaction that has misled us for 90 years” Green Chem. 2015, 17, 1390-1394
	Cristofer Pezzetta,a,b Sofja Tshepelevitsh,c Ivo Leito,c and Giovanni Polid *
	a) Dr. Reddy’s Laboratories (EU), 410 Science Park, Milton Road, Cambridge CB4 0PE, UK
	b) School of Chemistry, Cardiff University, Park Place Main Building, Cardiff CF10 3AT, UK
	c) University of Tartu, Institute of Chemistry, Ravila 14a, Tartu 50411, Estonia
	d) Sorbonne Université, Institut Parisien de Chimie Moléculaire, UMR CNRS 8232, Case 229, 4 Place Jussieu 75252 Paris Cedex 05, France
	* E-mail: giovanni.poli@sorbonne-universite.fr

## Sheet: pKa
Estimating pKa of water in methanol
Experimental pKa values in water-methanol mixtures. 25,0°C, I=0
M% MeOH	pKa(H2O)	pKa(MeOH)	D
0	15.74	15.54	0.2			Meaning of the experimental Ka(H2O):
5.88	15.79	15.556	0.234
12.3	15.804	15.542	0.262			Data taken from:
18.3	15.818	15.544	0.274			Tables of rate and equilibrium constants of heterolytic organic reactions, volume I(I); V. Palm, Ed.; Moscow, 1975.
36	15.86	15.585	0.275
45.8	15.876	15.601	0.275			Original works cited in the compilation:
56.8	15.989	15.707	0.282			Alfenaar, M.; de Ligny, C. L. Recueil trav. chim. 1967, 86, 929.
69.2	16.204	15.898	0.306			Rochester C. H. J. Chem. Soc. Dalton II, 1972, 5.
83.5	16.682	16.331	0.351			Harned, H. S.; Hamer, W. J. J. Amer. Chem. Soc. 1933, 55, 2194.
100	?	18.202				Ballinger, P.; Long, F. A. J. Amer. Chem. Soc. 1960, 82, 795.
*M% - mole percents
Correlations and extrapolations
	Extrapolated values:
	Correlation:			pKa(H2O)
	pKa(H2O) vs. pKa(MeOH), 18-84%			18.7419
	D vs. M%(MeOH), 36-84%			18.6343
	pKa(H2O) vs. M%(MeOH), 45-100%			17.452	(probably underestimated, as comparison with pKa(MeOH) is counterintuitive)
	On the basis of different extrapolations the most probable pKa value of water in methanol:								18.7
	Estimated uncertainty (90% coverage probability):								1.2

## Sheet: Rate_constant_ratios
Calculation of the extreme estimates of rate constant ratios
Pure methanol						10% v/v (20 mole %) water in methanol
	MeOH	HONa	MeONa	H2O			MeOH	NaOH	MeONa	H2O
t0	941.609	1	0	0		t0	847.555	1	0	211.448
tequil	941.609 - x	1.000 - x	x	x		tequil	847.555 - x	1.000 - x	x	211.448 + x
	Value	Unc.	Min.	Max.		pKeq was estimated from the correlation pKa(H2O)-pKa(MeOH) vs. M%(MeOH) (see the sheet 'pKa')
pKa(H2O)=	18.7	1.2	17.5	19.9
pKa(MeOH)=	18.202	0.5	17.702	18.702			Value	Unc.	Min.	Max.
pKeq=	-0.498	1.3	-1.798	0.802		pKeq=	-0.337912	0.707107	-1.04502	0.369195
	Min.	Mean	Max.				Min.	Mean	Max.
Keq =	0.157761	3.14775	62.8058			Keq =	0.427371	2.17727	11.0922
	Parameters of the quadratic equation:						Parameters of the quadratic equation:
a	-0.842239	2.14775	61.8058			a	-0.572629	1.17727	10.0922
b	-148.707	-2967.1	-59201.3			b	-574.096	-2058.98	-9623.81
c	148.549	2963.95	59138.5			c	362.221	1845.35	9401.27
x =	0.99335	0.999662	0.999983			x =	0.630544	0.896707	0.977879
a =	149.386	2961.8	59076.7			a =	1.70668	8.68118	44.2057
ra/rc =	11.9509	236.944	4726.14			ra/rc =	0.136535	0.694494	3.53645
